# Supplementary material
Source: publisher figshare collection journal article supplement (https://frontiersin.figshare.com/ndownloader/files/25528658)
Supplement: Supplementary file 1 [file 25528658]

Supplementary Material

# Supplementary Figures and Tables

## Supplementary Figures

Plot A


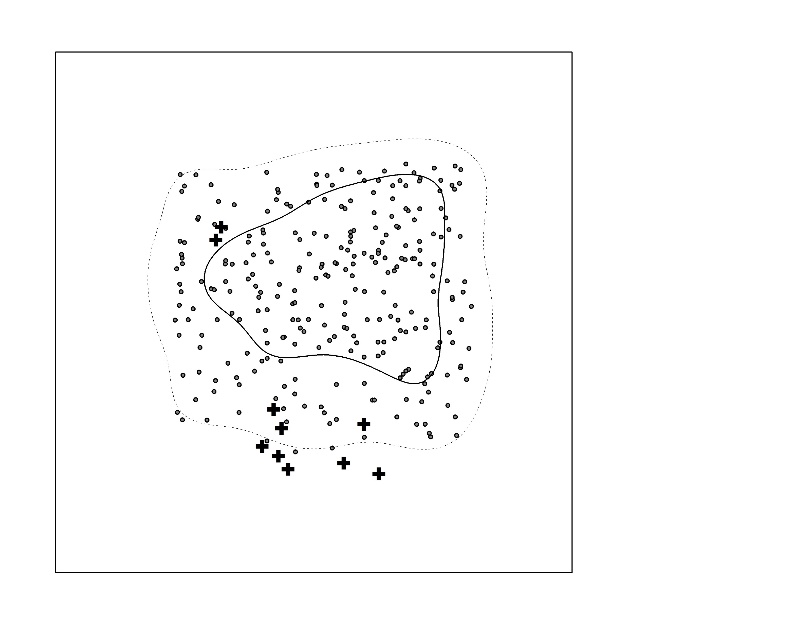

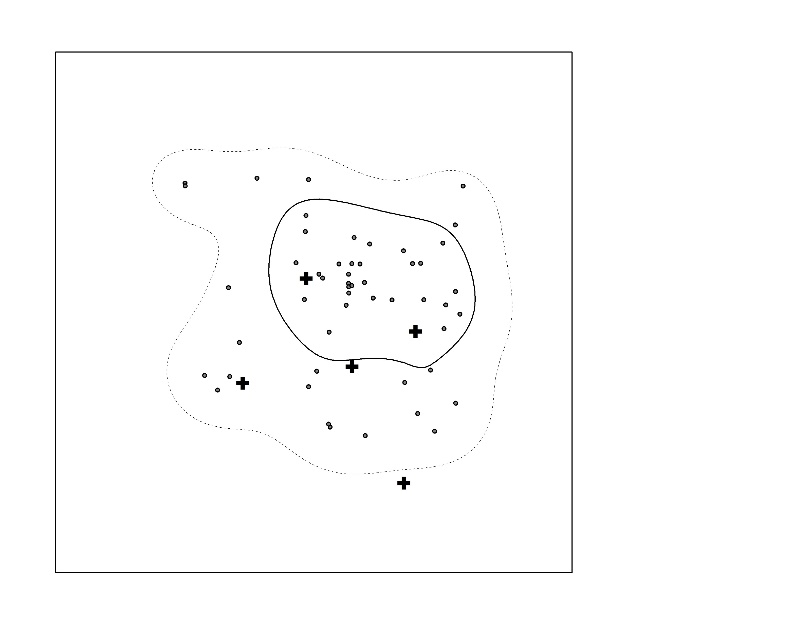

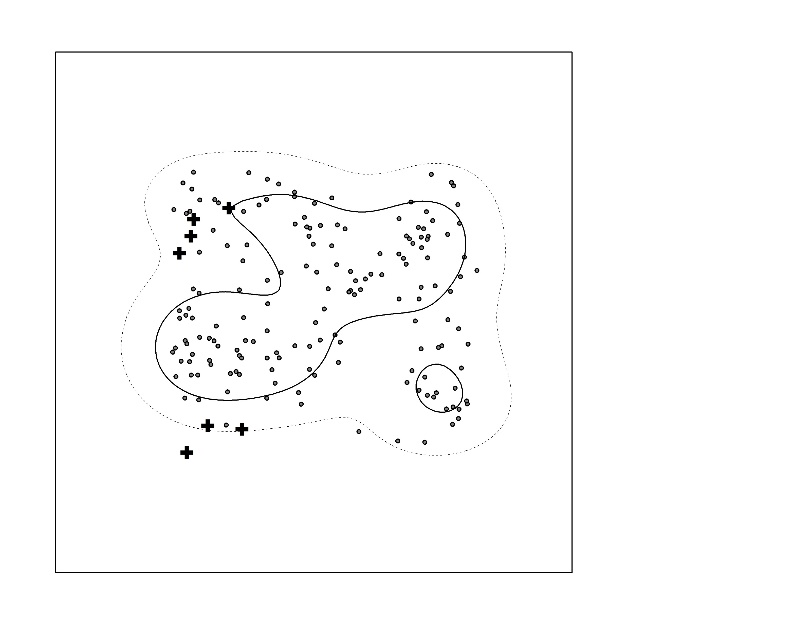

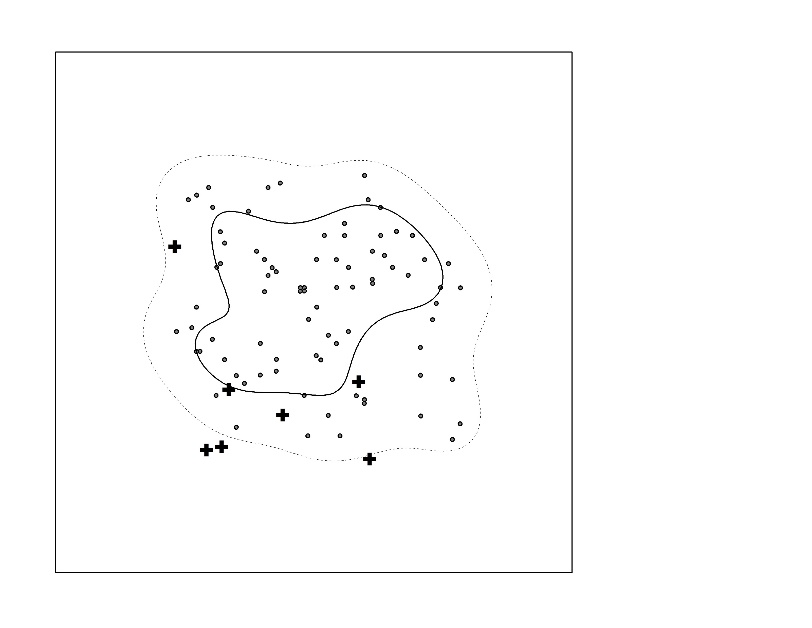


2012

2013

2014

2015


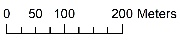

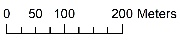

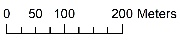

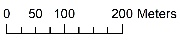


Plot B


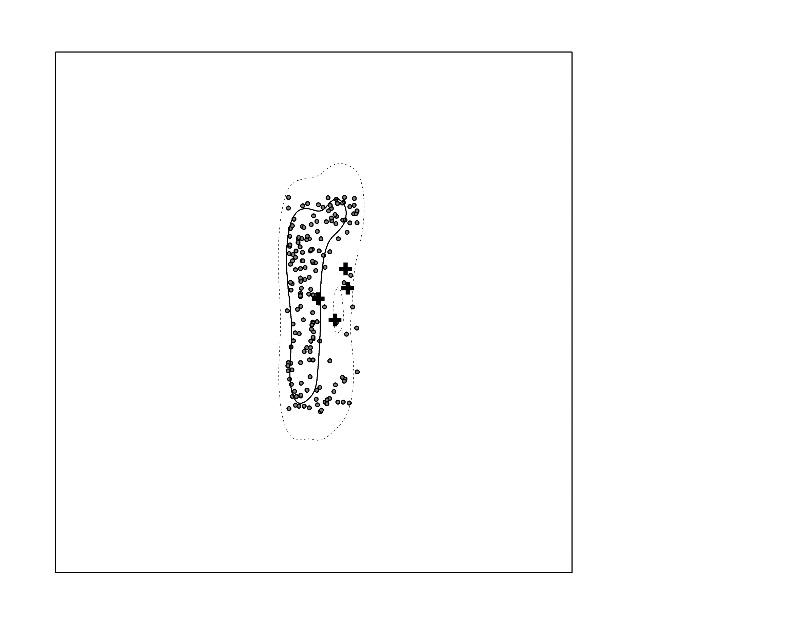

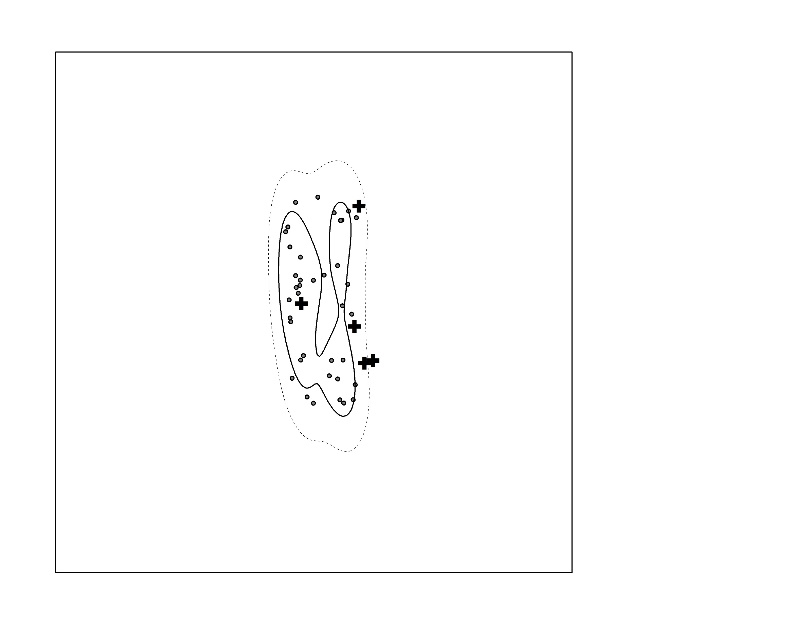

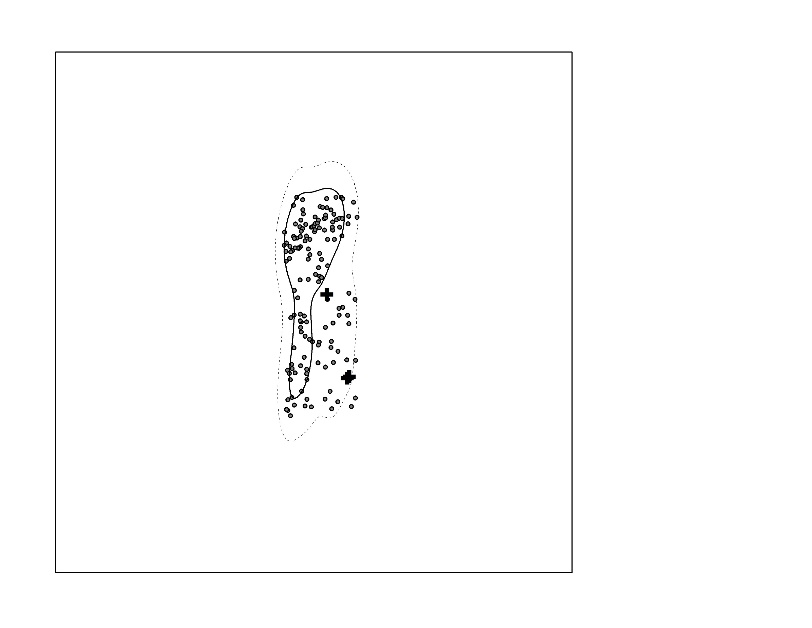

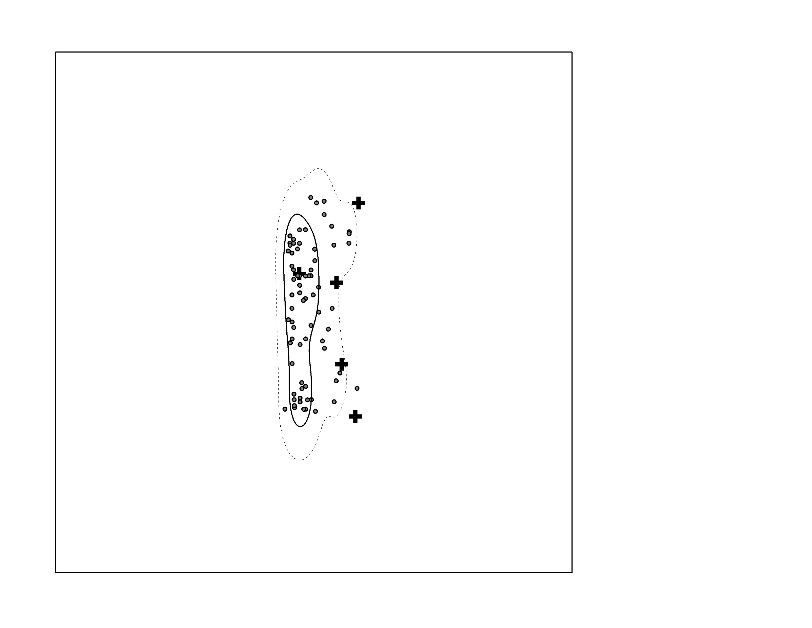


2012

2013

2014

2015


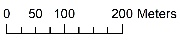

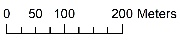

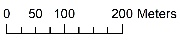

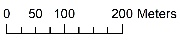


Plot C


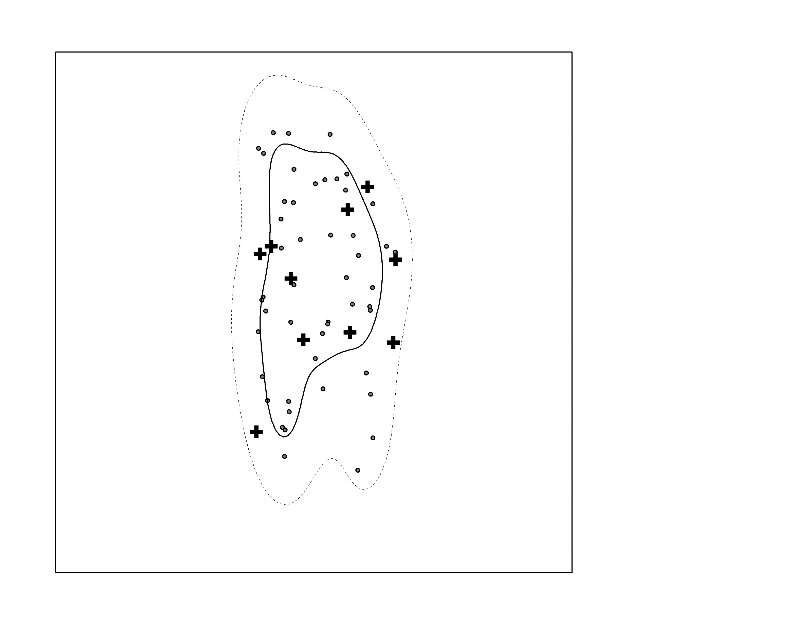

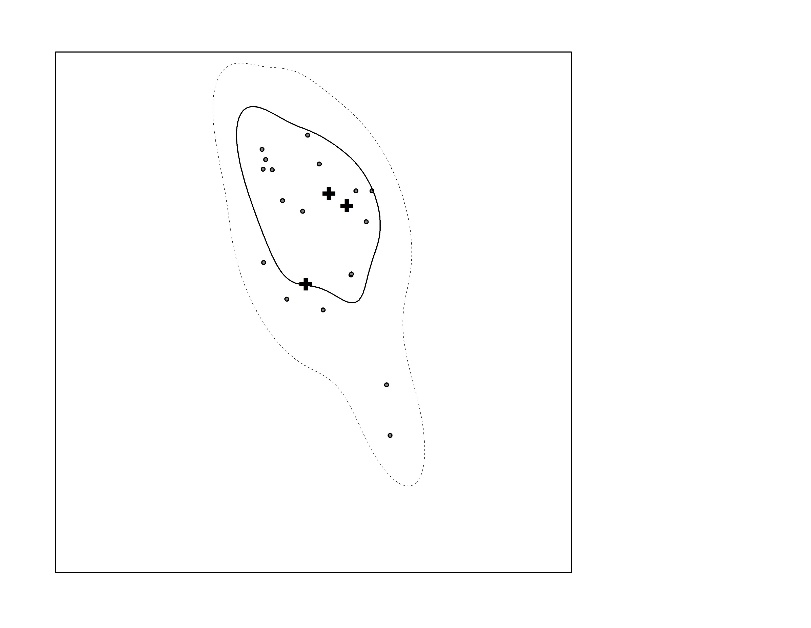

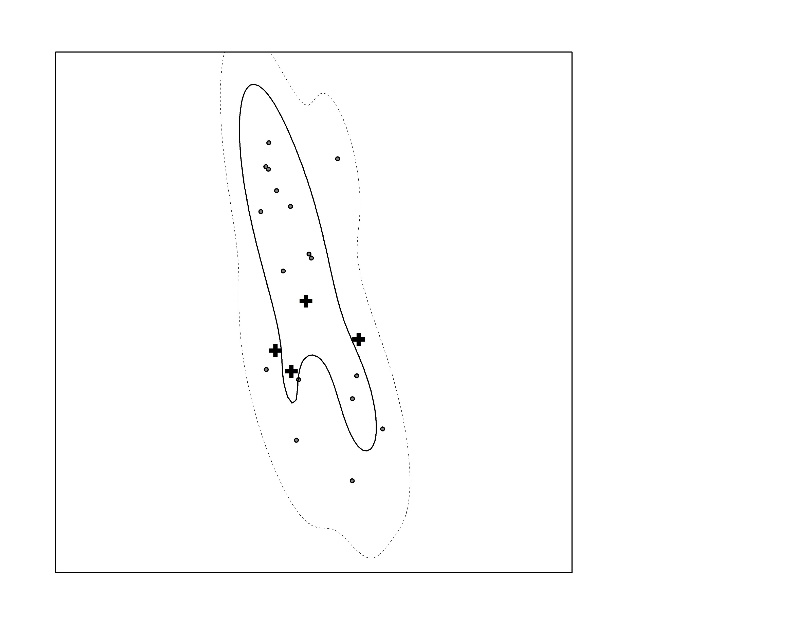

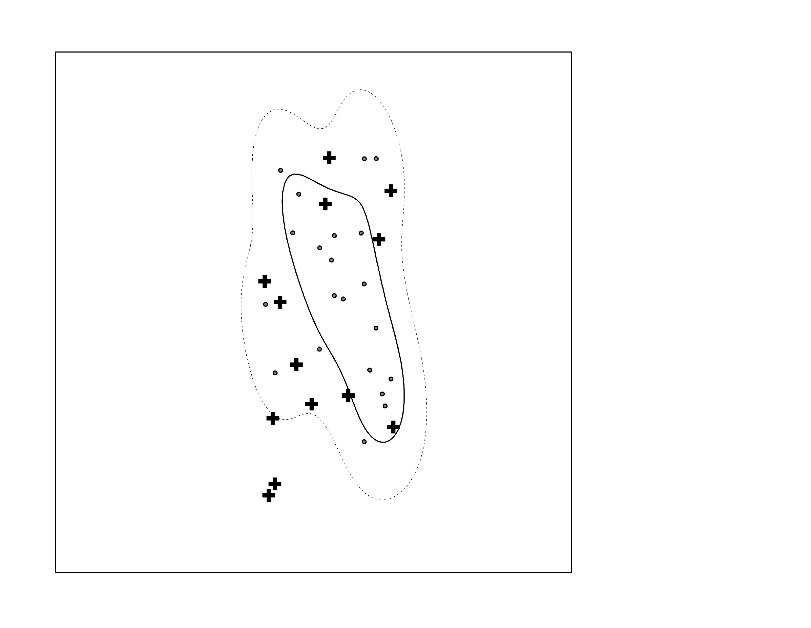


2012

2013

2014

2015


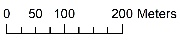

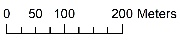

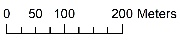

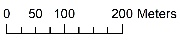

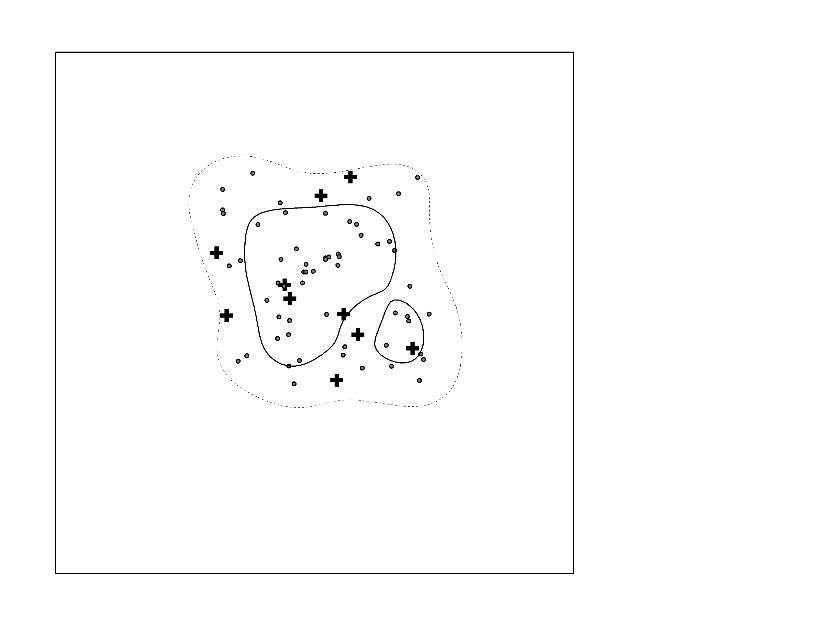


Plot D


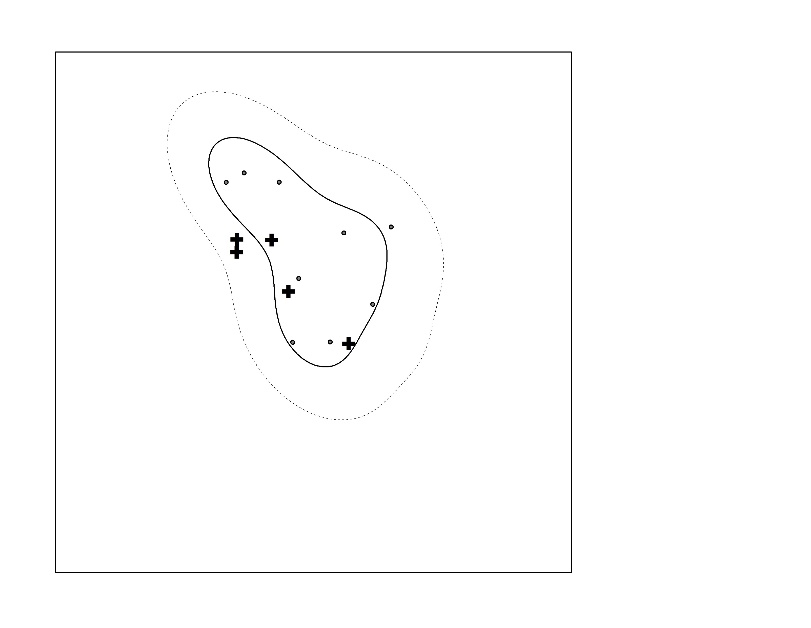

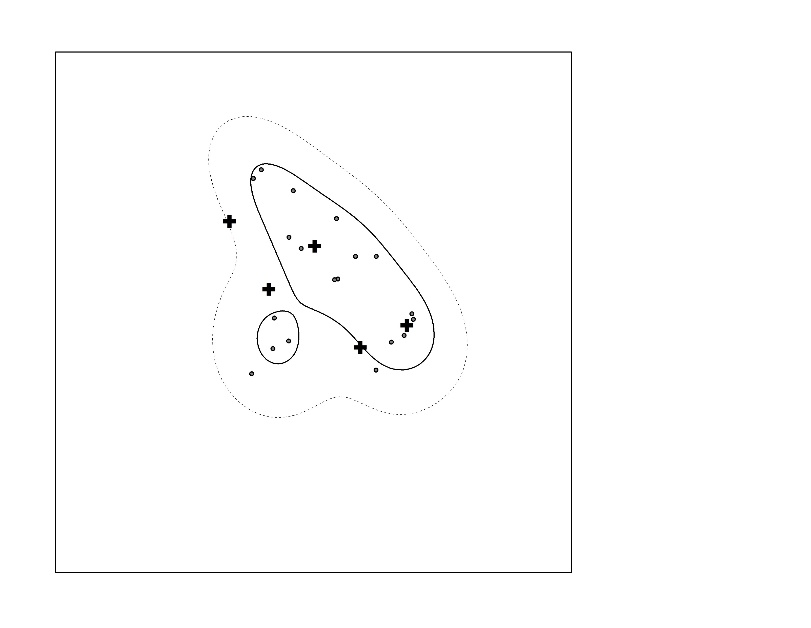


2012

2014

2013


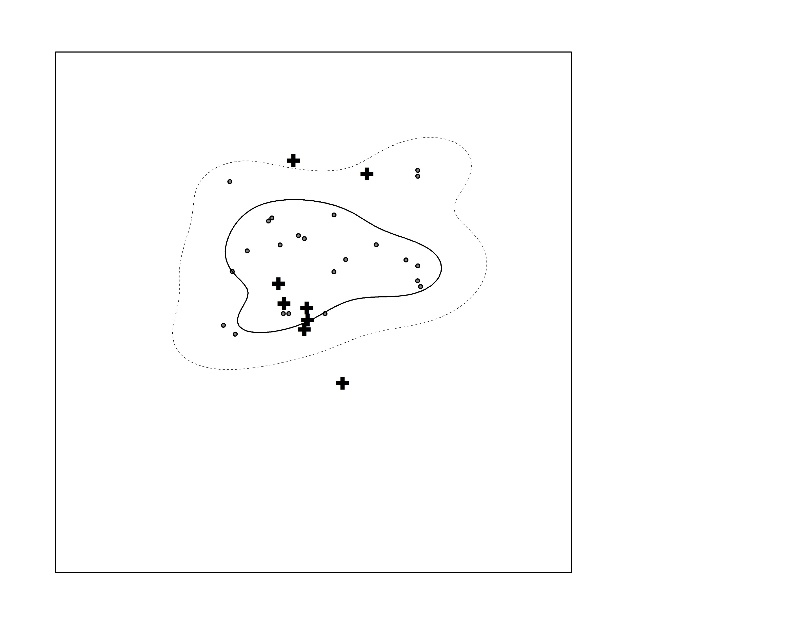


2015


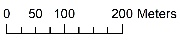

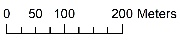

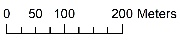

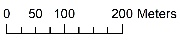


**Supplementary Figure 1.** Eastern Chipmunk activity estimated using kernel density functions based on 50% isopleth (solid line) and 90% isopleth (dotted line) densities. Mapped detections of Eastern Chipmunks are also shown by dots (“.”) for each plot and year, as well as the locations of Hermit Thrush and Ovenbird nests (+).


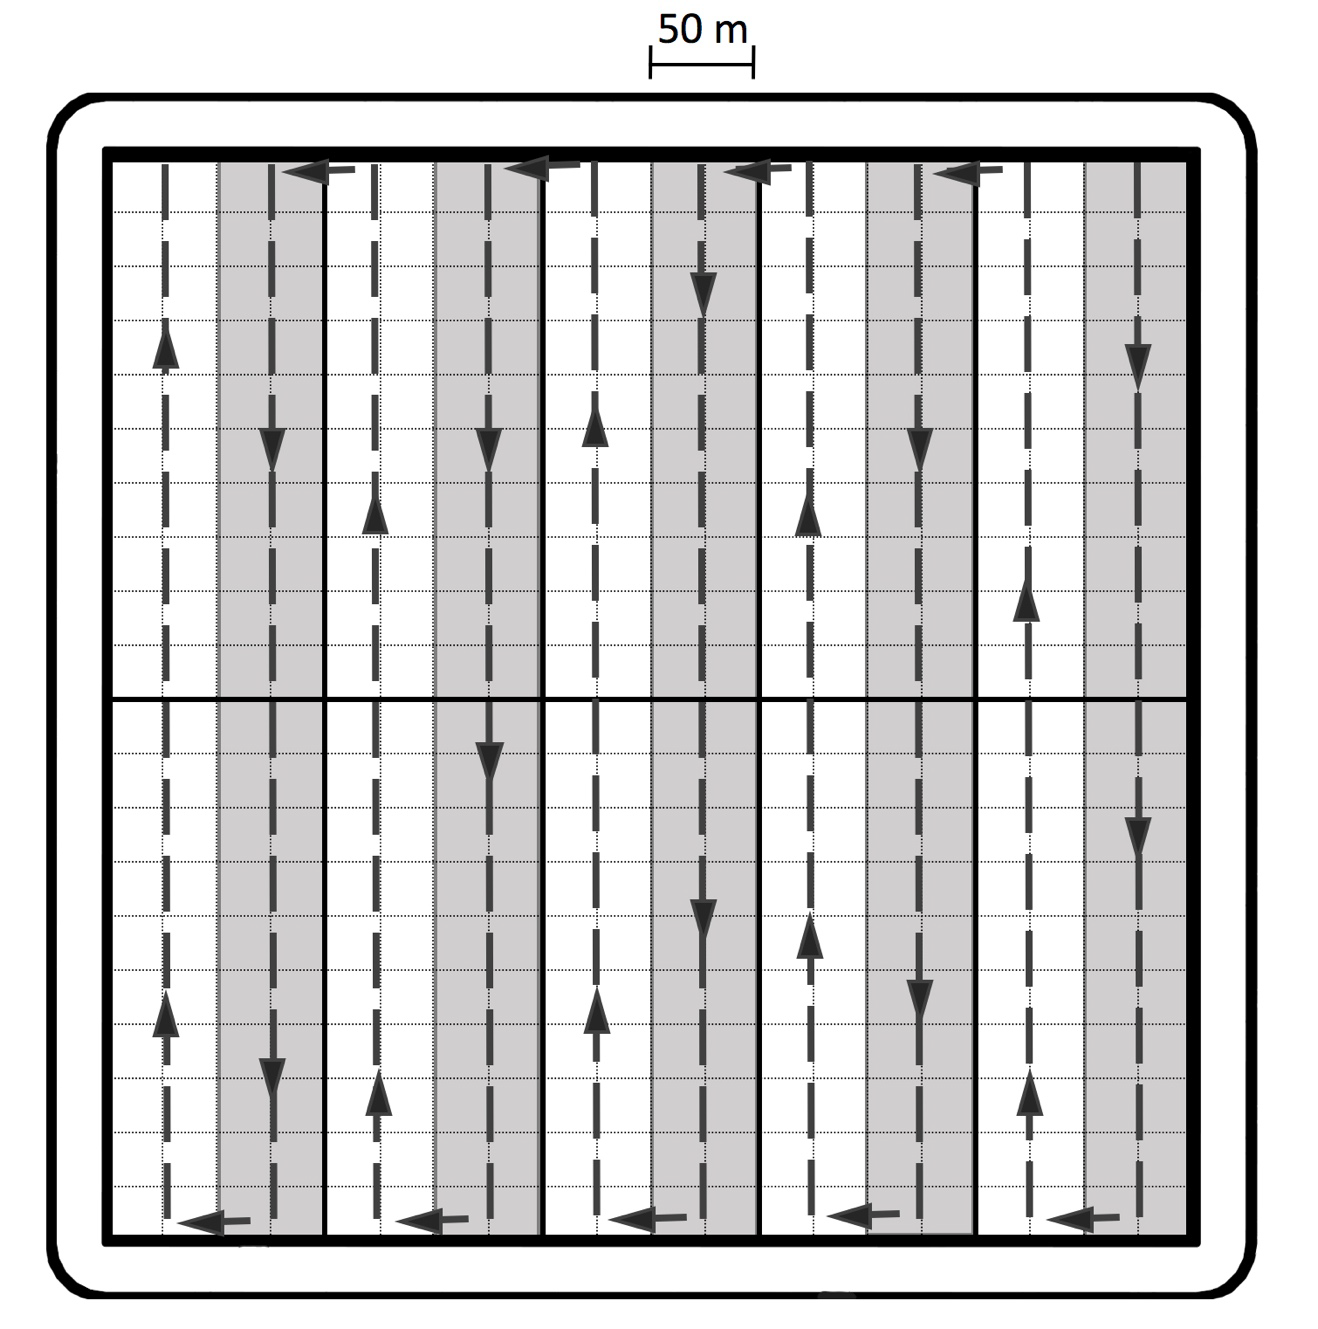


**Supplementary Figure 2**. Map showing transects used to survey Eastern Chipmunks in study plot B. Observers walked slowly along dotted lines and recorded all visual and aural detections within a 25-m band on either side of the transect line. Starting points were alternated between visits.


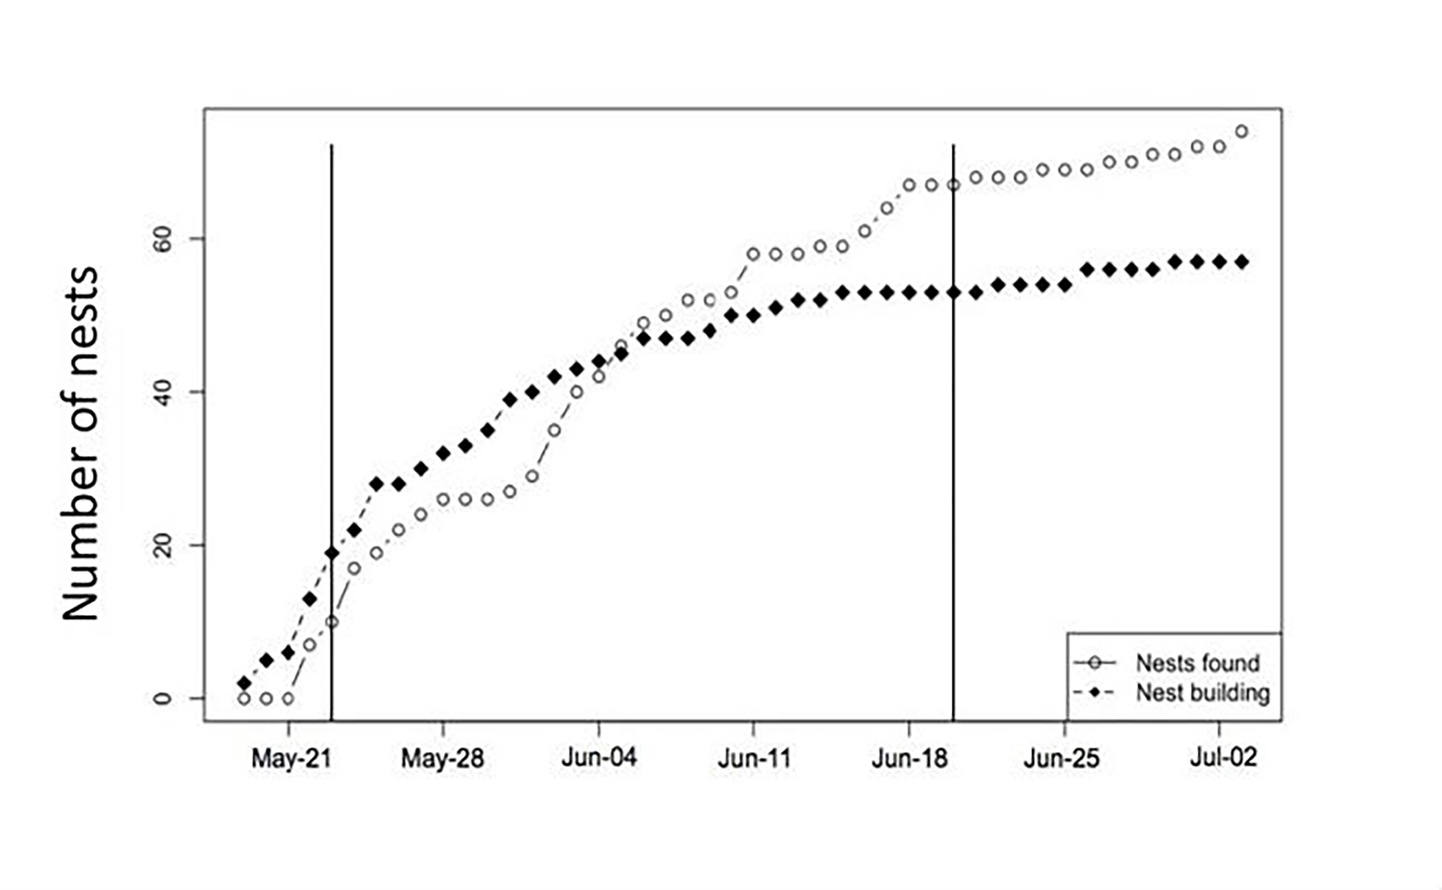


**Supplementary Figure 3**. Cumulative increase in the number of ovenbird nests found on (or backdated to) the first day of nest building (black diamonds; n=57), or at any stage (open symbols; n=86) in the summer of 2012 in New Brunswick, Canada. Solid vertical lines indicate the beginning and the end of the spot mapping of Eastern Chipmunks. Note that this data set was collected in a broader study area (see Haché and Villard 2010) encompassing the study plots analyzed here.

**Supplementary Table 1**. Mean number of nest predator detections per study plot and year, with corresponding standard errors.

| Year | Plot | Eastern Chipmunk | | | Red Squirrel | | | Blue Jay | | |
| --- | --- | --- | --- | --- | --- | --- | --- | --- | --- | --- |
| 2012 | A | 46.2 | ± | 7.5 | 1.3 | ± | 0.4 | 2.3 | ± | 0.9 |
| B | 28.3 | ± | 6.9 | 0.8 | ± | 0.3 | 0.8 | ± | 0.4 |
| C | 7.7 | ± | 3.0 | 0.7 | ± | 0.3 | 0.2 | ± | 0.2 |
| D | 9.5 | ± | 1.6 | 1.2 | ± | 0.4 | 0.5 | ± | 0.3 |
| 2013 | A | 10.2 | ± | 3.7 | 0.0 | ± | 0.0 | 0.2 | ± | 0.2 |
| B | 6.6 | ± | 1.7 | 0.4 | ± | 0.2 | 0.0 | ± | 0.0 |
| C | 3.2 | ± | 0.9 | 0.2 | ± | 0.2 | 0.2 | ± | 0.2 |
| D | 1.8 | ± | 1.0 | 0.0 | ± | 0.0 | 0.0 | ± | 0.0 |
| 2014 | A | 27.8 | ± | 5.4 | 0.3 | ± | 0.2 | 1.5 | ± | 0.7 |
| B | 22.5 | ± | 3.9 | 1.2 | ± | 0.5 | 1.0 | ± | 0.4 |
| C | 2.8 | ± | 0.9 | 0.7 | ± | 0.3 | 0.0 | ± | 0.0 |
| D | 3.2 | ± | 0.2 | 1.8 | ± | 1.1 | 0.3 | ± | 0.2 |
| 2015 | A | 20.0 | ± | 5.7 | 0.0 | ± | 0.0 | 0.0 | ± | 0.0 |
| B | 13.5 | ± | 2.6 | 1.0 | ± | 0.5 | 0.2 | ± | 0.2 |
| C | 3.8 | ± | 1.3 | 0.5 | ± | 0.2 | 0.0 | ± | 0.0 |
| D | 3.0 | ± | 0.6 | 0.3 | ± | 0.3 | 0.0 | ± | 0.0 |

**Supplementary Table 2**. Effects of Eastern Chipmunk activity (as estimated using the kernel approach, “Chipmunk”), songbird species (“Species”), plot, and year on daily nest survival rate from 2012 to 2015. Results of generalized linear models with a binomial link function are shown. Bold indicates the best models according to *ΔAIC.* All other models did not converge.

| Model | *K* | *AIC* | *ΔAIC* | *Weight* | *Deviance* |
| --- | --- | --- | --- | --- | --- |
| **Chipmunk + Species** | 3 | 108.69 | 0.00 | 0.30 | -51.16 |
| **Species** | 2 | 108.89 | 0.19 | 0.27 | -52.35 |
| **Species + Plot** | 5 | 109.24 | 0.55 | 0.23 | -49.15 |
| **Chipmunk + Species + Plot** | 6 | 110.01 | 1.31 | 0.16 | -48.33 |
| Null | 1 | 115.86 | 7.16 | 0.01 | -56.90 |
| Chipmunk + Year | 5 | 115.96 | 7.26 | 0.01 | -52.50 |
| Chipmunk | 2 | 116.83 | 8.13 | 0.01 | -56.32 |
| Plot | 4 | 117.12 | 8.43 | 0.00 | -54.25 |
| Plot + Year | 7 | 117.51 | 8.81 | 0.00 | -50.84 |
| Chipmunk + Plot + Year | 8 | 118.56 | 9.86 | 0.00 | -50.08 |
| Chipmunk + Plot | 5 | 118.70 | 10.00 | 0.00 | -53.87 |
| Chipmunk*Plot | 5 | 118.98 | 10.29 | 0.00 | -54.02 |
| Year | Did not converge | | | | |
| Chipmunk*Species | Did not converge | | | | |
| Chipmunk*Year | Did not converge | | | | |
| Year + Species | Did not converge | | | | |
| Year*Species | Did not converge | | | | |
| Plot*Year | Did not converge | | | | |
| Species + Plot +Year | Did not converge | | | | |
| Species + Chipmunk + Year | Did not converge | | | | |
| Species + Chipmunk + Year + Plot | Did not converge | | | | |

**Supplementary Table 3.** Parameter estimates and standard errors (SE) from the best generalized linear model explaining daily nest survival rate of two songbird species (see Supplementary Table 2 for the different models we compared). Chipmunk: estimated Eastern Chipmunk activity at the nest.

| Explanatory Variables | Estimate | *SE* | *z* | *P* |
| --- | --- | --- | --- | --- |
| Intercept | 1.32 | 0.49 | 2.718 | 0.007 |
| Chipmunk | 0.20 | 0.14 | 1.362 | 0.173 |
| Species(Ovenbird) | 1.32 | 0.43 | 3.050 | 0.002 |

**Supplementary Table 4.** Parameter estimates and standard errors (SE) from the second best generalized linear model explaining daily nest survival rate of two songbird species (see Supplementary Table 2 for the different models we compared).

| Explanatory Variables | Estimate | *SE* | *z* | *P* |
| --- | --- | --- | --- | --- |
| Intercept | 1.89 | 0.34 | 5.527 | < 0.001 |
| Species(Ovenbird) | 1.19 | 0.42 | 2.799 | 0.005 |

**Supplementary Table 5.** Parameter estimates and standard errors (SE) from the third best generalized linear model explaining daily nest survival rate of two songbird species (see Supplementary Table 2 for the different models we compared).

| Explanatory Variables | Estimate | *SE* | *z* | *P* |
| --- | --- | --- | --- | --- |
| Intercept | 1.97 | 0.51 | 3.880 | <0.001 |
| Species(Ovenbird) | 1.34 | 0.44 | 3.024 | 0.002 |
| Plot A | -1.07 | 0.58 | -1.860 | 0.063 |
| Plot B | -0.10 | 0.65 | -0.161 | 0.872 |
| Plot C | 0.21 | 0.56 | 0.378 | 0.706 |

**Supplementary Table 6.** Parameter estimates and standard errors (SE) from the fourth best generalized linear model explaining daily nest survival rate of two songbird species (see Supplementary Table 2 for the different models we compared). Chipmunk: estimated Eastern Chipmunk activity at the nest.

| Explanatory Variables | Estimate | *SE* | *z* | *P* |
| --- | --- | --- | --- | --- |
| Intercept | 1.36 | 0.66 | 2.078 | 0.038 |
| Chipmunk | 0.17 | 0.15 | 1.165 | 0.244 |
| Species(Ovenbird) | 1.43 | 0.45 | 3.183 | 0.001 |
| Plot A | -0.87 | 0.59 | -1.465 | 0.143 |
| Plot B | -0.05 | 0.67 | -0.070 | 0.944 |
| Plot C | 0.40 | 0.57 | 0.694 | 0.488 |

**Supplementary Table 7.** Effects of Eastern Chipmunk activity (as estimated using kernel approach, “Chipmunk”), songbird species (“Species”), and year on daily nest survival rate during intermediary years (2014 to 2015). Results of generalized linear models with a binomial link function are shown. Bold indicates the best models according to *ΔAIC.* All other models did not converge.

| Model | *K* | *AIC* | *ΔAIC* | Weight | Deviance |
| --- | --- | --- | --- | --- | --- |
| **Chipmunk + Plot + Year** | 6 | 60.81 | 0.00 | 0.67 | -23.17 |
| Plot + Year | 5 | 62.82 | 2.02 | 0.24 | -25.55 |
| Plot | 4 | 66.41 | 5.60 | 0.04 | -28.65 |
| Chipmunk + Plot | 5 | 66.46 | 5.65 | 0.04 | -27.37 |
| Chipmunk + Year | 3 | 70.86 | 10.05 | 0.00 | -32.10 |
| Chipmunk + Species + Year | 4 | 72.15 | 11.34 | 0.00 | -31.52 |
| Chipmunk + Species | 3 | 72.97 | 12.16 | 0.00 | -33.16 |
| Chipmunk | 2 | 73.97 | 13.16 | 0.00 | -34.83 |
| Null | 1 | 74.30 | 13.49 | 0.00 | -36.10 |
| Species | 2 | 74.59 | 13.78 | 0.00 | -35.14 |
| Chipmunk*Species | 3 | 76.04 | 15.24 | 0.00 | -34.70 |
| Year | Did not converge | | | | |
| Chipmunk*Year | Did not converge | | | | |
| Chipmunk*Plot | Did not converge | | | | |
| Year + Species | Did not converge | | | | |
| Year*Species | Did not converge | | | | |
| Species + Plot | Did not converge | | | | |
| Species + Plot + Year | Did not converge | | | | |
| Species + Plot + Chipmunk | Did not converge | | | | |
| Chipmunk + Plot + Year | Did not converge | | | | |
| Chipmunk + Species + Plot + Year | Did not converge | | | | |

**Supplementary Table 8.** Parameter estimates and standard errors (SE) from the best generalized linear model explaining daily nest survival rate of two songbird species for the years 2014-2015 (see Supplementary Table 7 for the different models compared). Chipmunk: estimated Eastern Chipmunk activity at the nest.

| Explanatory Variables | Estimate | *SE* | *z* | *P* |
| --- | --- | --- | --- | --- |
| Intercept | 0.64 | 1.24 | 0.514 | 0.607 |
| Chipmunk | 0.66 | 0.35 | 1.910 | 0.056 |
| Plot A | -1.97 | 1.00 | -1.973 | 0.049 |
| Plot B | 0.50 | 1.15 | 0.432 | 0.666 |
| Plot C | 1.43 | 1.06 | 1.357 | 0.175 |
| Year 2015 | 2.24 | 0.87 | 2.562 | 0.010 |
